# Supplementary material
Source: publisher site journal article supplement (https://www.dovepress.com/article/389535)
Supplement: Supplementary file 1 [file get_supplementary_file.php]

**Supplementary materials**

**
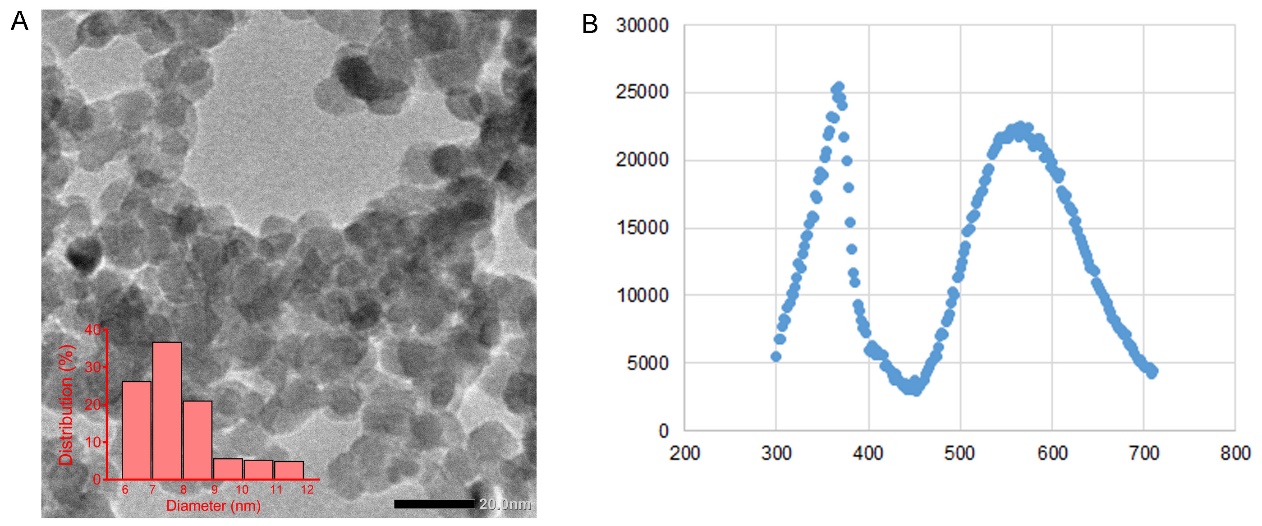
**

**Figure S1** Characterization of ZnO QDs. (A) TEM and (B) photoluminescence (PL) spectra. The insets of the TEM images show the corresponding particle size distribution of ZnO QDs.


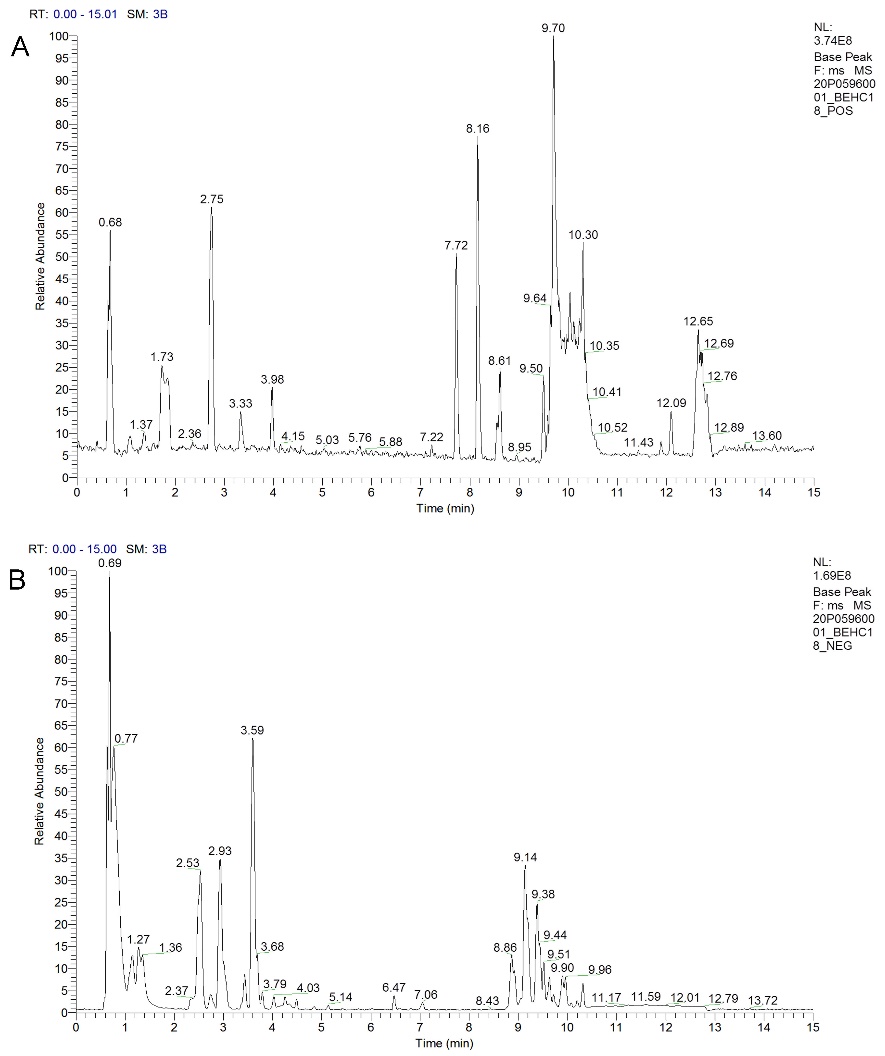


**Figure S2.** Representative base peak chromatograms (BPC) from untreated SMMC-7721 cells UPLC-MS/MS system: (A) pos, (B) neg.


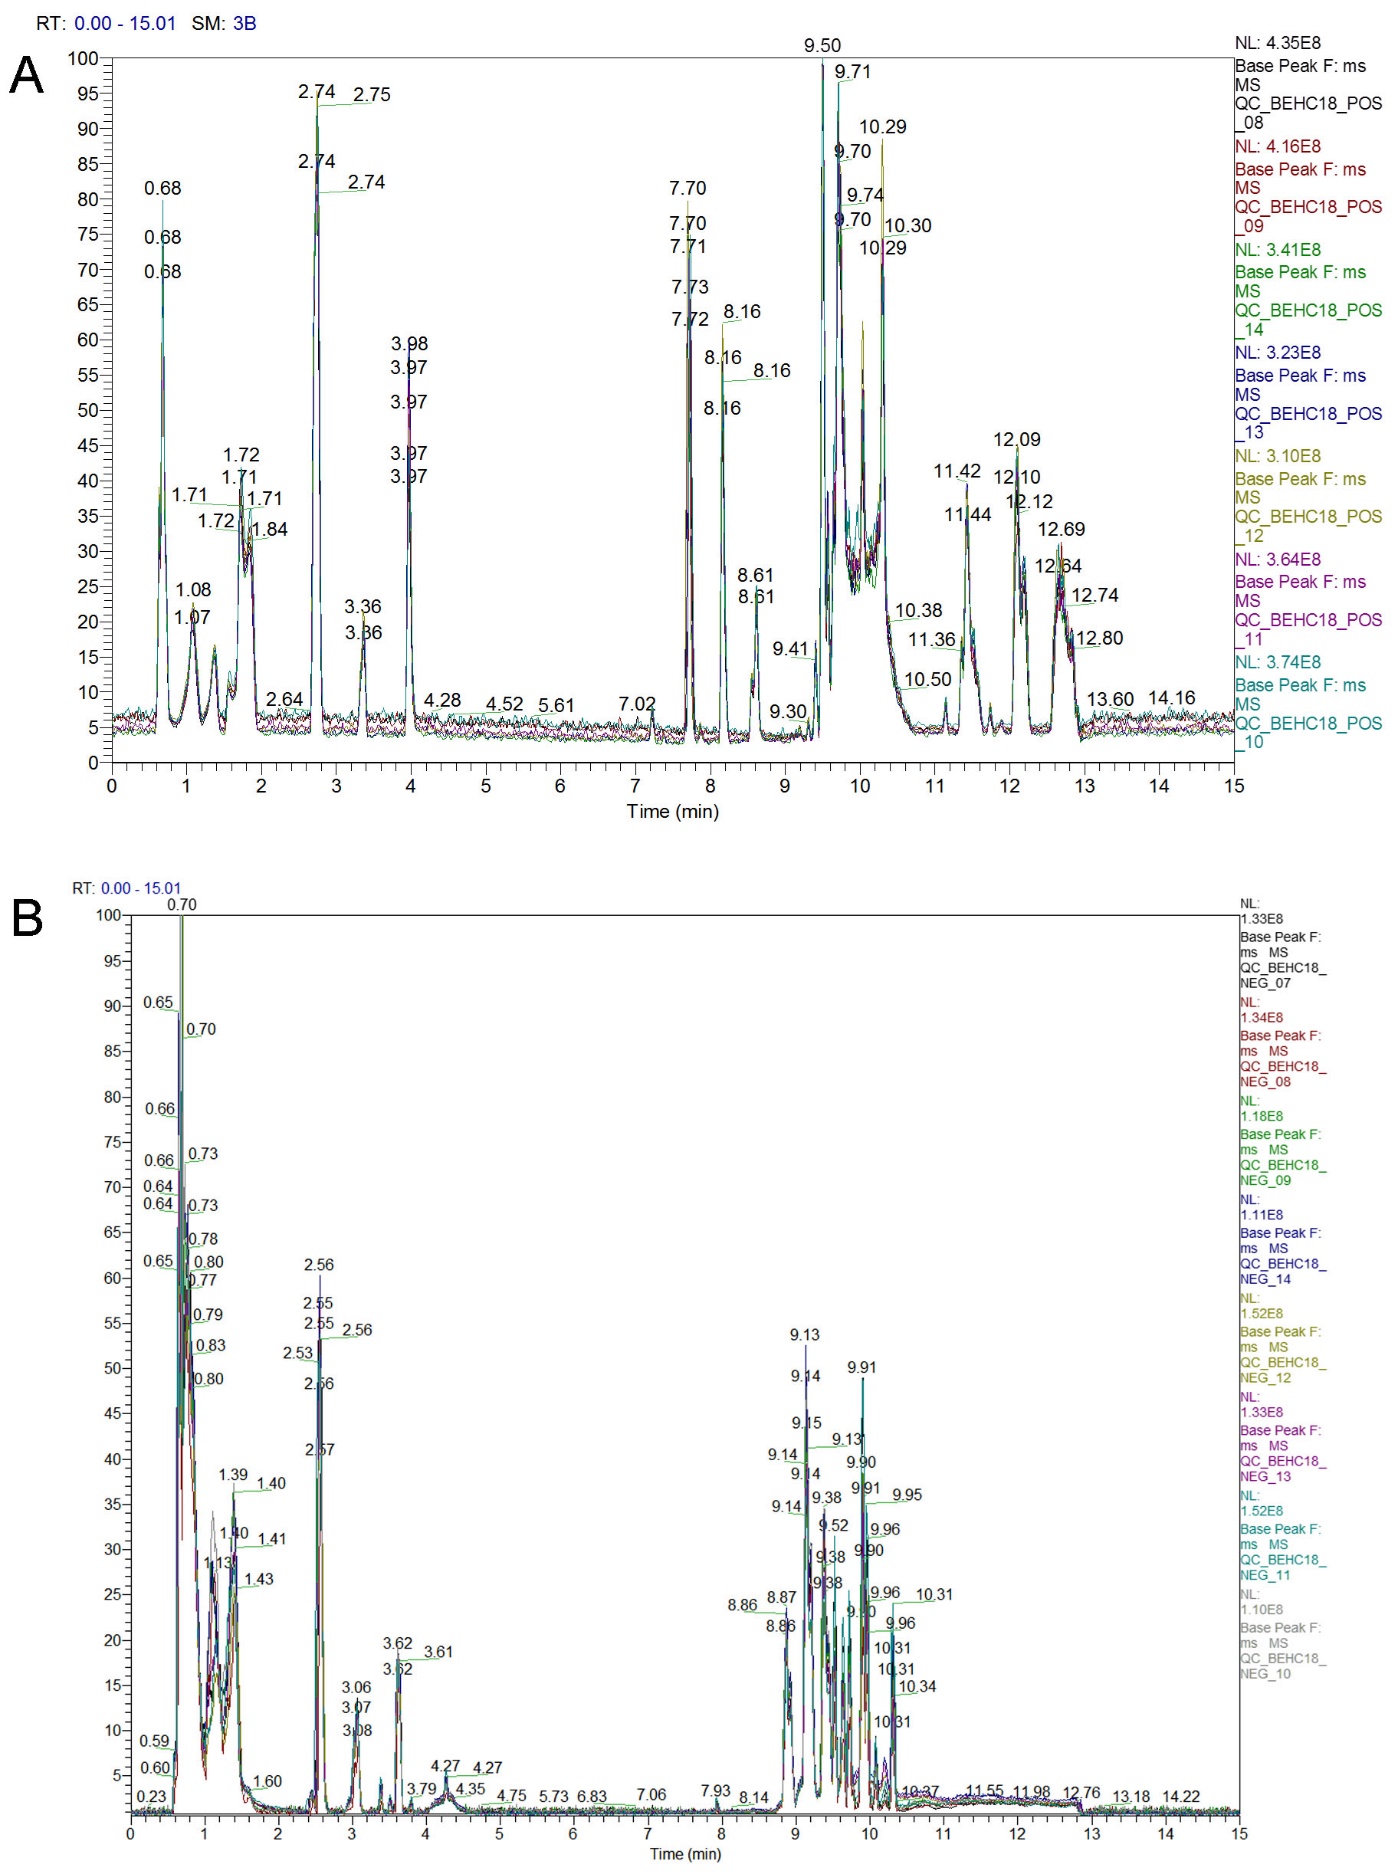


**Figure S3.** Overlay the base peak chromatograms (BPC) of all QC samples in UPLC-MS/MS system: (A) pos, (B) neg.

**
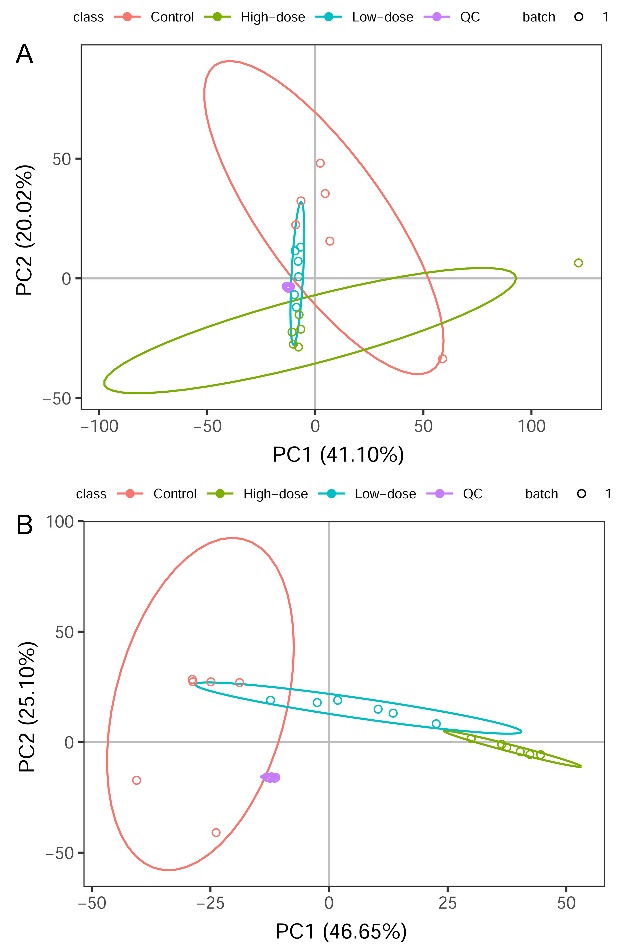
**

**Figure S4.** Score plots of the PCA model of all samples and QC: (A) pos, (B) neg.


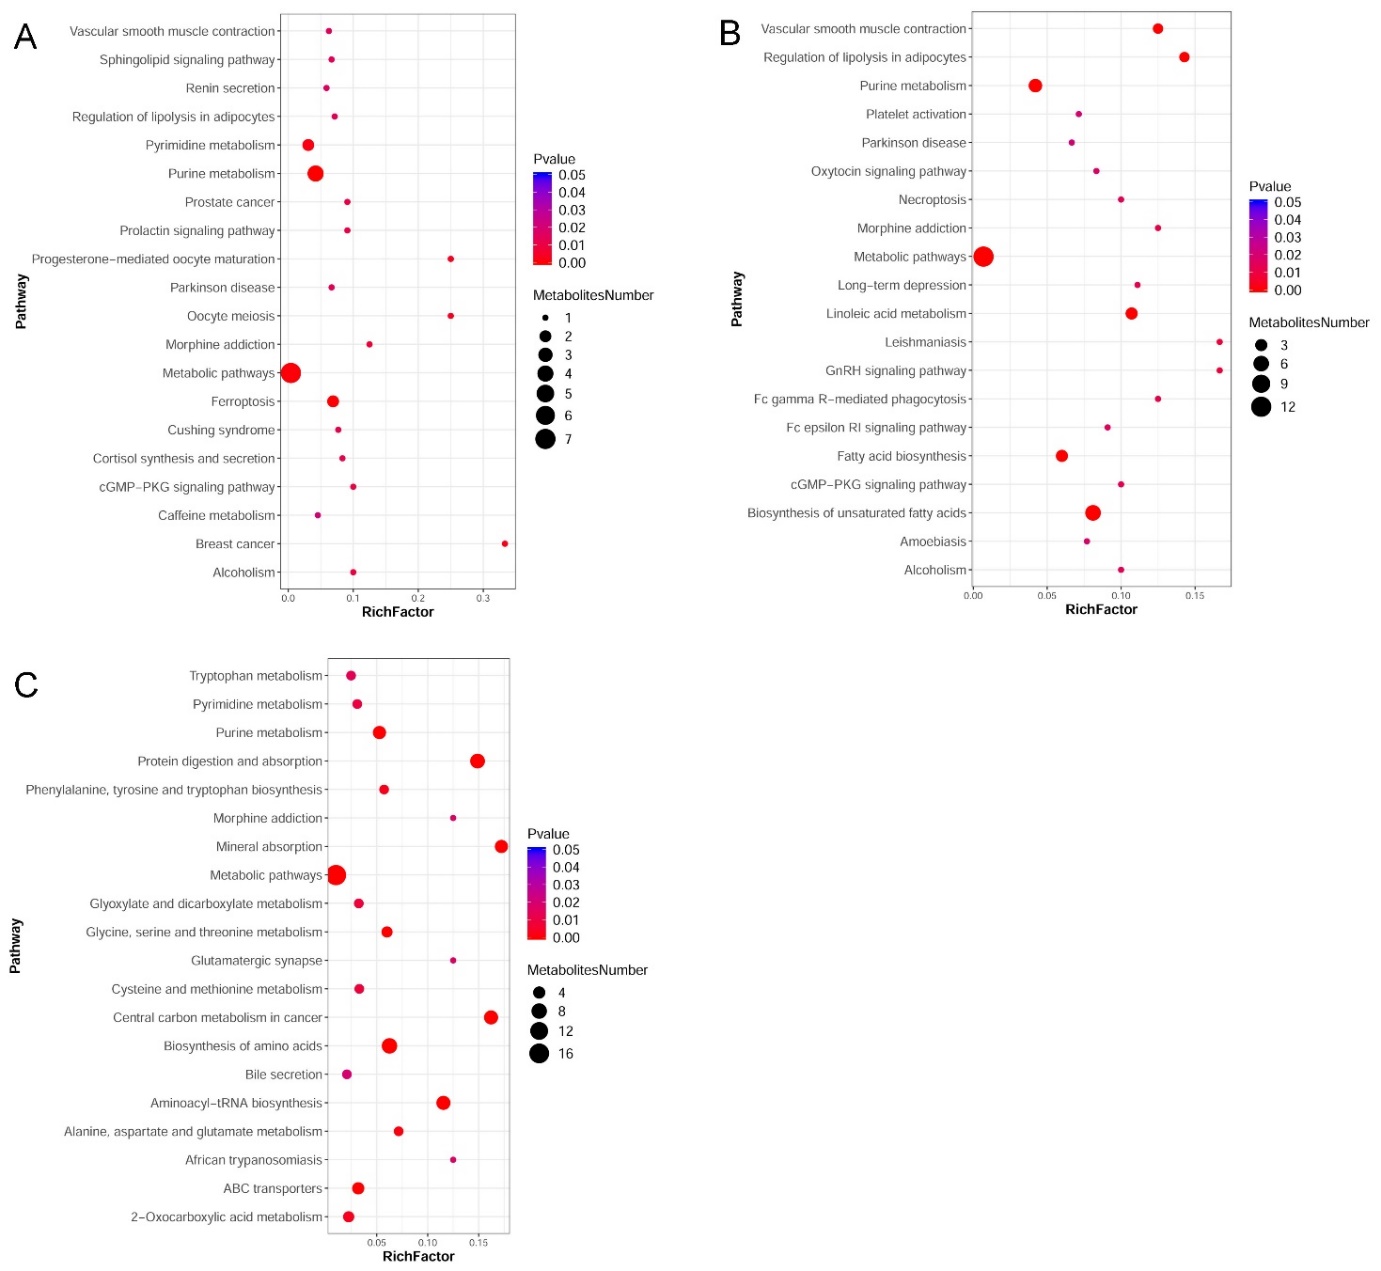


**Figure S5.** Scatterplot of significantly enriched KEGG pathways of differential metabolites induced by ZnO quantum dots. (A) 50 µg/mL in pos; (B) 20 µg/mL in neg; (C) 50 µg/mL in neg. The size of the dots represents the metabolites number.
